# Supplementary material for: Zwitterionic diketopyrrolopyrrole for fluorescence/photoacoustic imaging guided photodynamic/photothermal therapy
Source: Royal Society of Chemistry journal article supplement (doi:10.1039/c8py00244d), 2018-01-01
Supplement: c8py00244d1.pdf [file c8py00244d1.pdf]

## Electronic Supplementary Information

### Zwitterionic Diketopyrrolopyrrole for Fluorescence/Photoacoustic Imaging Guided Photodynamic/Photothermal Therapy

Weixing Deng,<sup>a</sup> Qi Wu,<sup>a</sup> Pengfei Sun,<sup>a</sup> Pengcheng Yuan,<sup>a</sup> Xiaomei Lu,<sup>b</sup> Quli Fan<sup>a\*</sup> and Wei Huang<sup>b</sup>

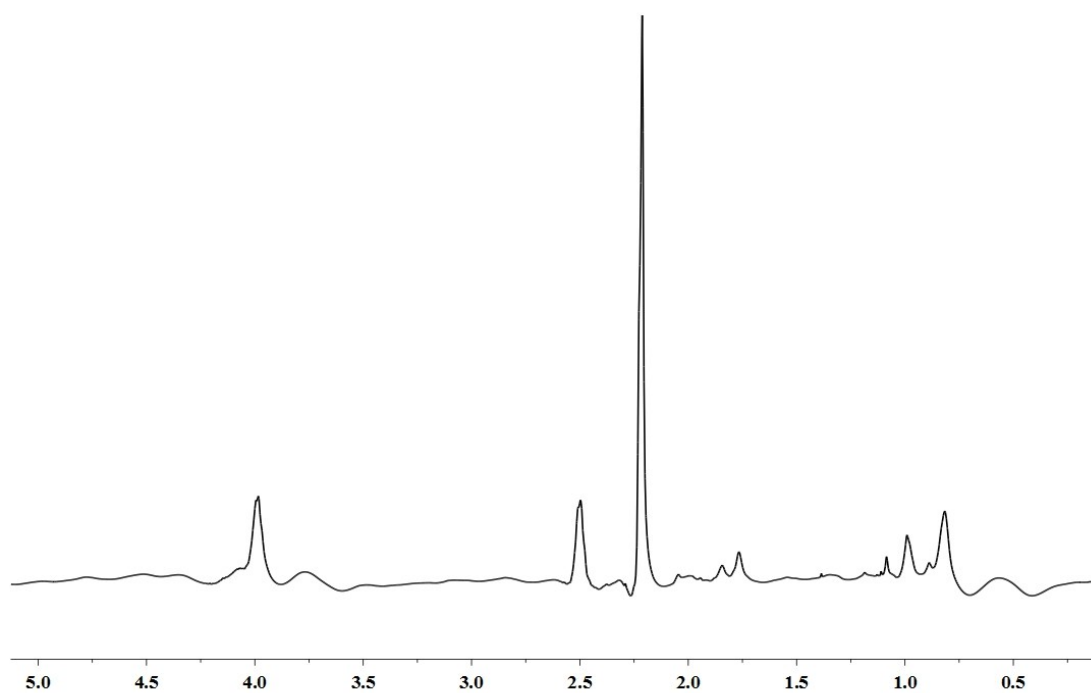

Figure S1. <sup>1</sup>H NMR of alkynyl-PDMAEMA in CDCl<sub>3</sub>.

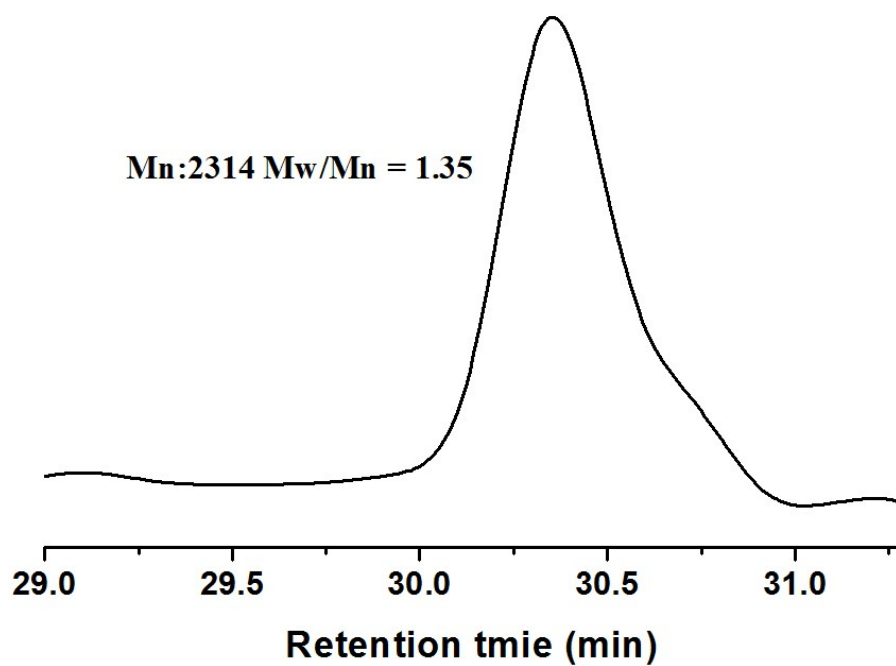

Figure S2. GPC of PDMAEMA

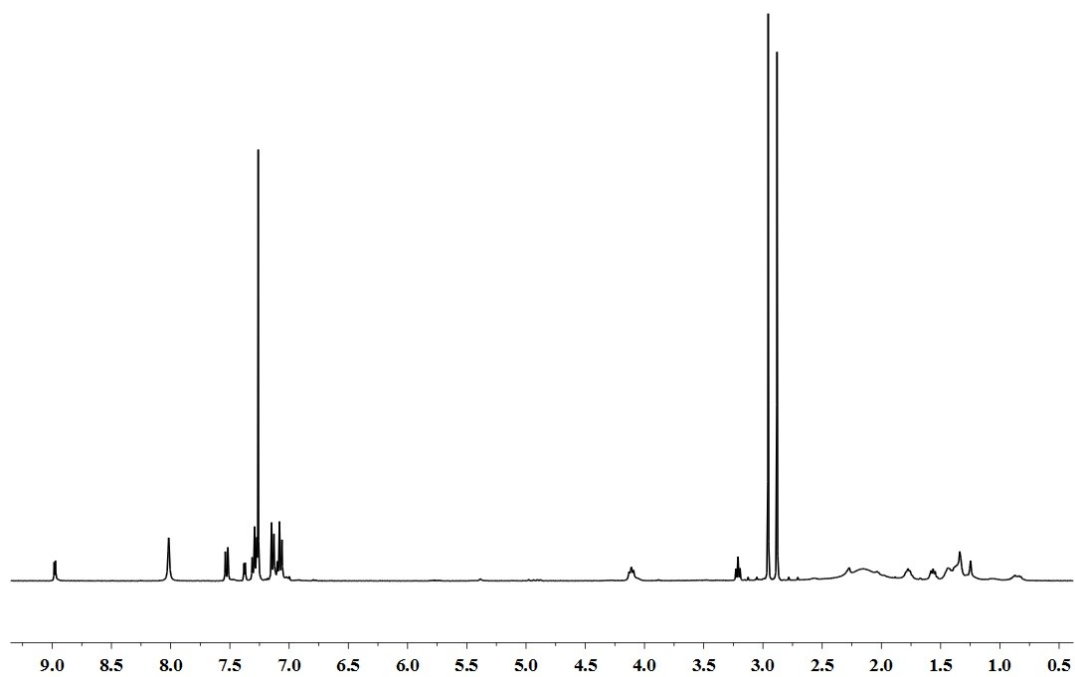

Figure S3.  $^1\text{H}$  NMR of DPP-PDMAEMA in  $\text{CDCl}_3$ .

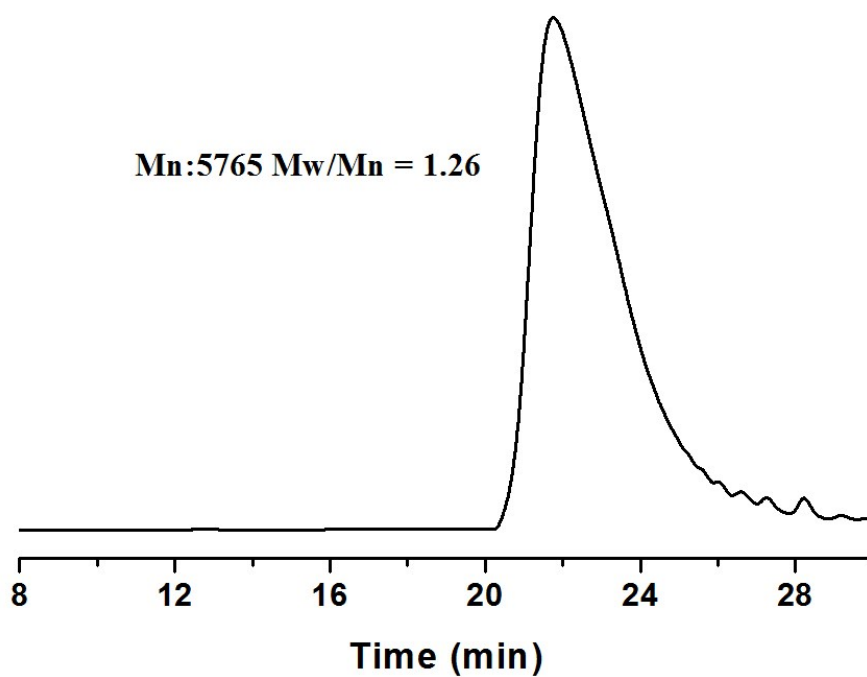

Figure S4. GPC of DPP-PDMAEMA

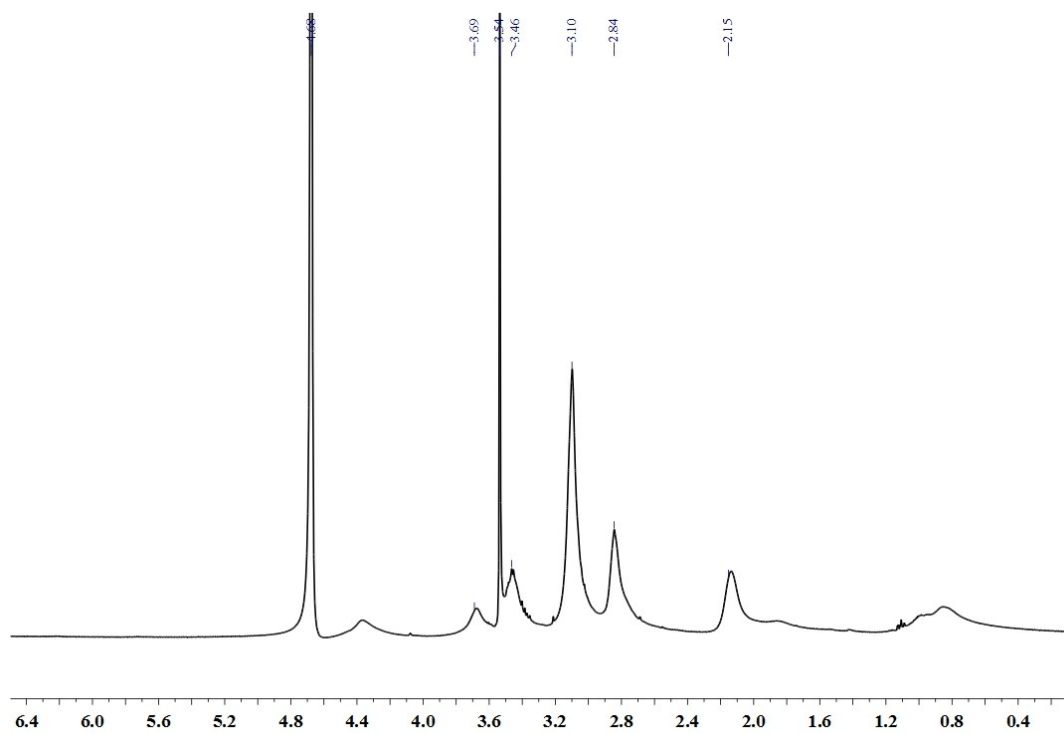

Figure S5.  $^1\text{H}$  NMR of DPP-SPMA in  $D_2O$ .

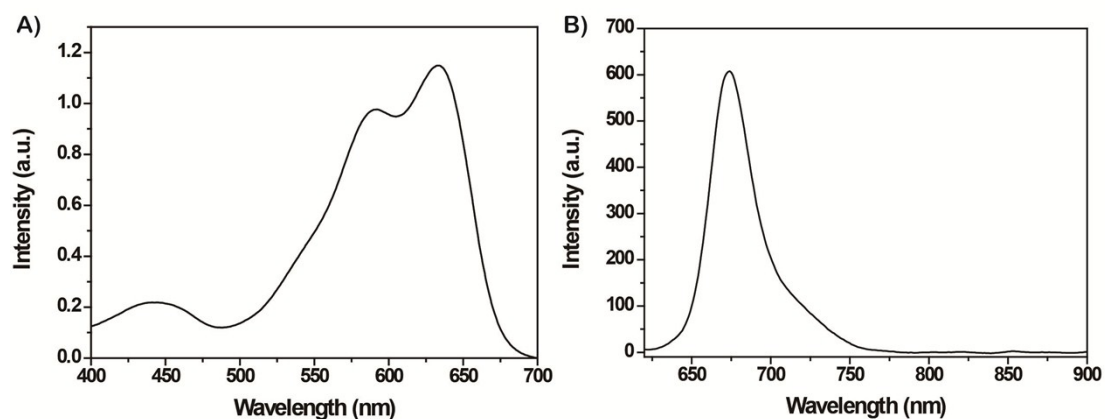

Figure S6. UV spectra of DPP-PDMAEMA in THF

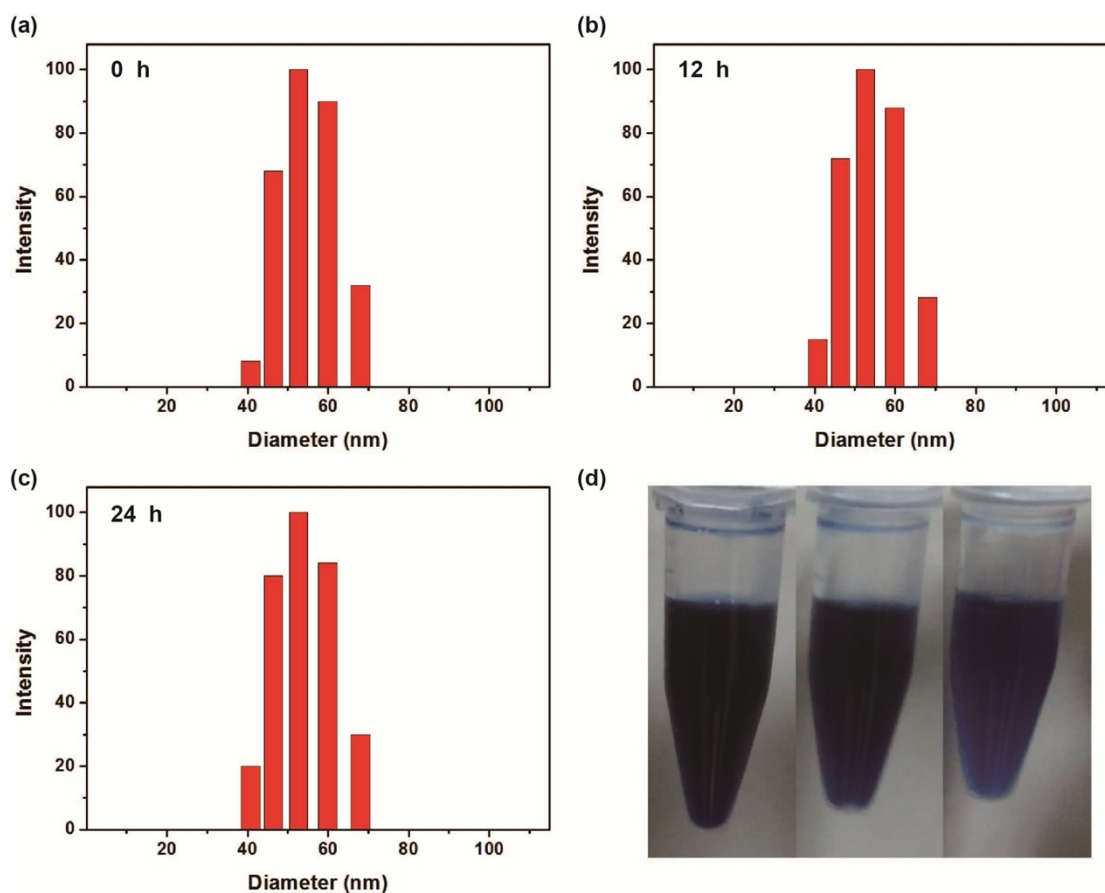

Fig. S7 stability of DPP-SPMA in water solution. Particle size change of DPP-SPMA in aqueous solution (a) 0 h, (b) 12 h, and (c) 24 h. (d) Photos of DPP-SPMA aqueous solutions with different concentrations placed in ambient for a month shows clear solutions without any precipitation.

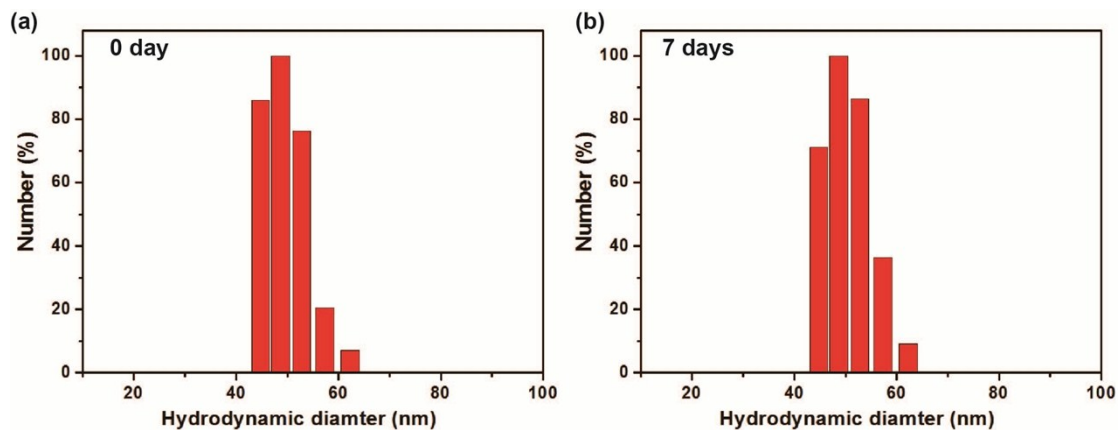

Fig. S8 Particle size of DPP-SPMA in PBS solution placed with different time. Almost unchanged particle size of DPP-SPMA in PBS solution illustrating the stability of DPP-SPMA PBS solutions.

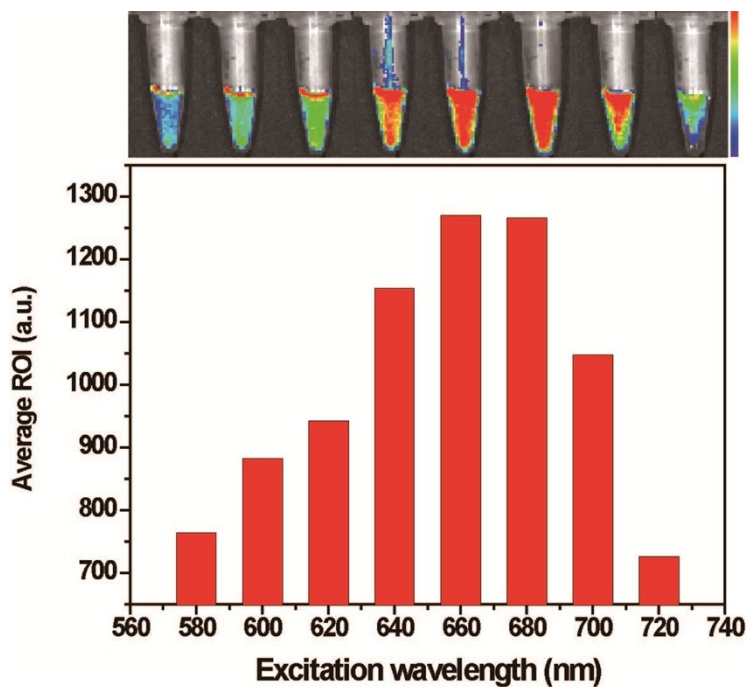

Figure S9. Fluorescence intensity at 790 nm of DPP-SPMA aqueous solution under different excitation wavelength.

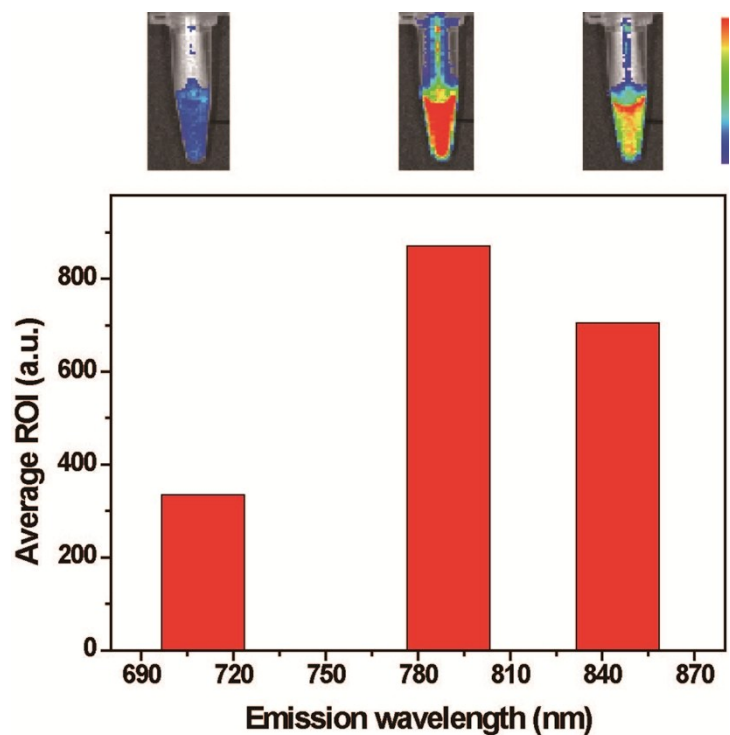

Figure S10. Fluorescence intensity of DPP-SPMA aqueous solution under 660 nm irradiation.

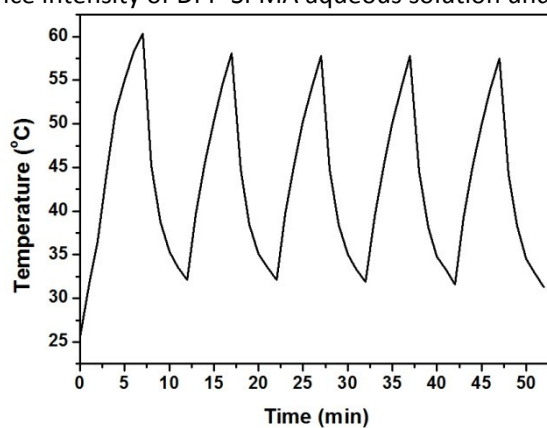

Figure S11. Temperature curve of DPP-SPMA aqueous solution under five cycles of photothermal heating by 730 nm laser.

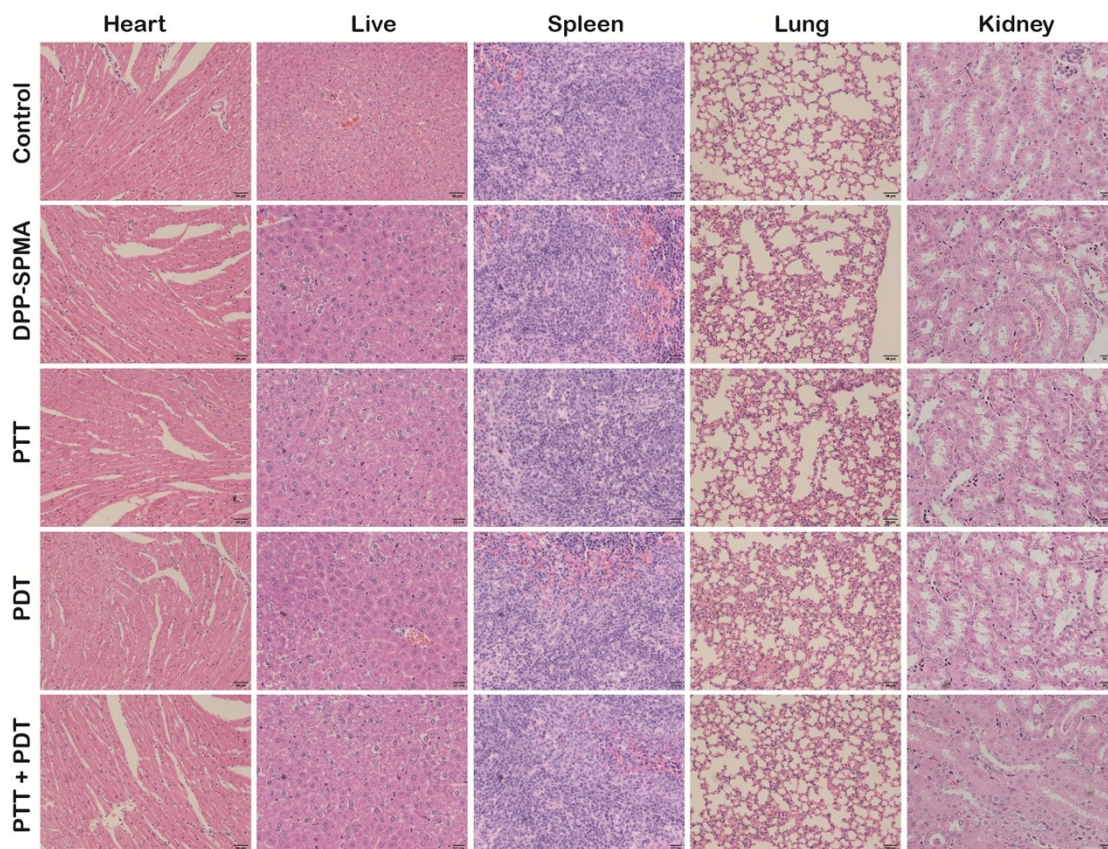

Figure S12. Comparison of H&E stained tissues with and without treatment.
